# Supplementary material for: Recurrent somatic mutation in DROSHA induces microRNA profile changes in Wilms tumour
Source: PubMed Central journal article supplement — Nat Commun. 2014 Jun 9;5:4039. doi: 10.1038/ncomms5039 (PMC4062040; doi:10.1038/ncomms5039), 2014-06-09
Supplement: ncomms5039-s1.pdf [file ncomms5039-s1.pdf]

## SUPPLEMENTARY FIGURES

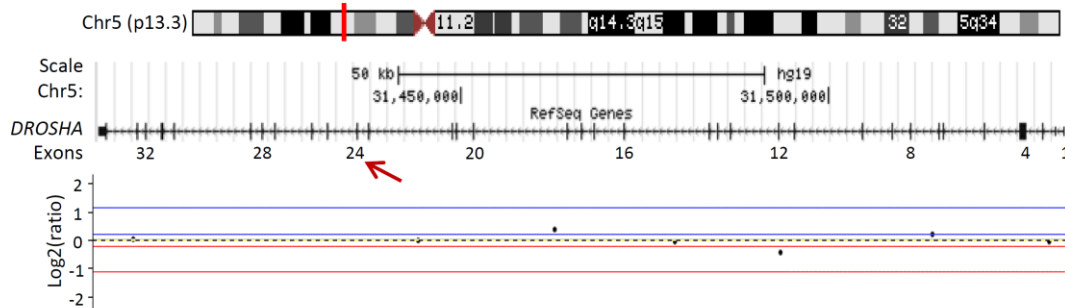

**b**

Duplex qPCR

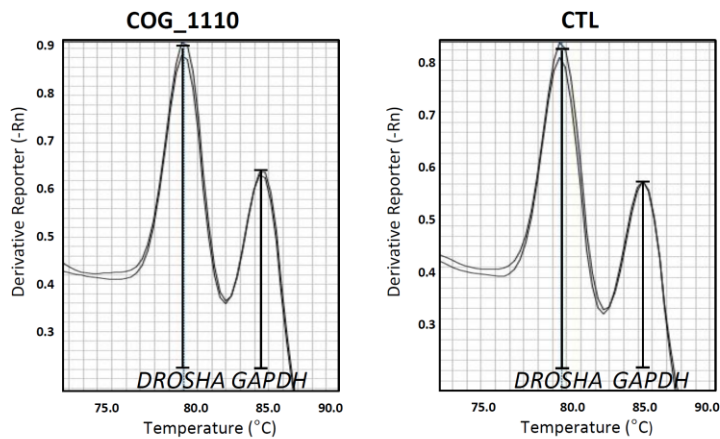

**Supplementary Figure 1:** Copy number analysis of *DROSHA* gene in patient COG\_1110. **(a)** Top panel displays a schematic representation of chromosome 5 and the *DROSHA* locus; middle panel displays the *DROSHA* exons (both modified from UCSC genome browser). Bottom panel presents the array-CGH profile of *DROSHA* genomic region. Seven probes were located within this gene and all probes presented normal log2 ratio values. **(b)** Duplex qPCR for the *DROSHA* exon 24 (location of E993K mutation) and a reference gene (*GAPDH*); duplex qPCR was performed as previously described<sup>1</sup> (primer sequences are available at Supplementary Table 12). The ratio between the peaks of the melting curve of the patient (COG\_1110) and a control sample (CTL) was 0.93, which confirmed the absence of copy number alterations in this region.

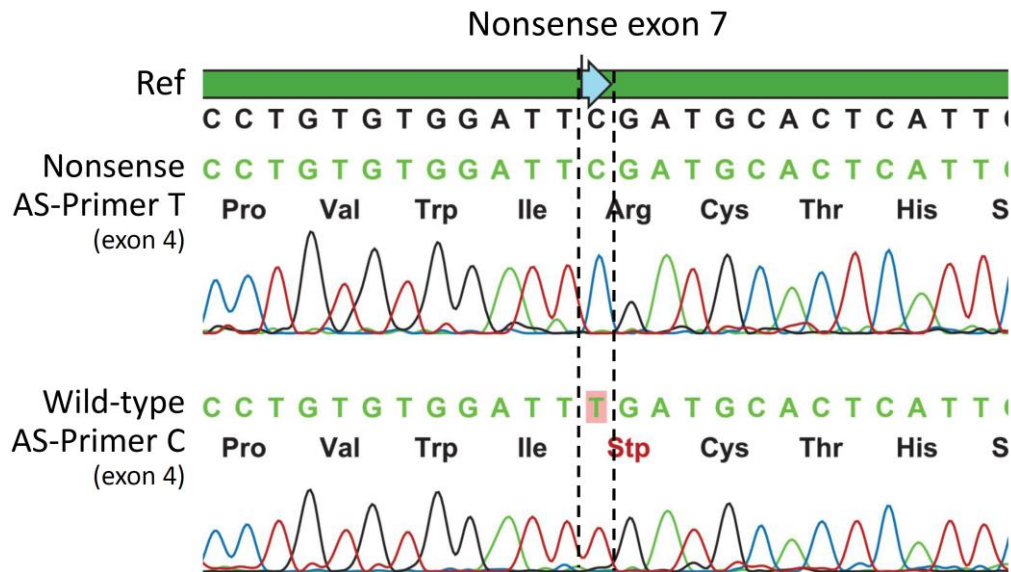

**Supplementary Figure 2:** Allele specific (AS) PCR of patient COG\_1108. To evaluate whether the two nonsense mutations (c.136C>T; p.Q46\* at exon 4 and c.1240C>T; p.R414\* at exon 7) were affecting each one of the alleles of the patient, allele specific forward primers were design for the c.136C>T nonsense mutation at exon 4, either to align with the mutated (T) or the wild-type (C) base at the 3' end. A common reverse primer located at exon 11 was used for amplification of cDNA (primer sequences are available at Supplementary Table 12). Amplification performed with AS-primer for the mutated allele at exon 4 resulted in amplification of the wild-type allele at exon 7 (top sequence). Amplification performed with AS-primer for the wild-type allele at exon 4 resulted in amplification of the mutated allele at exon 7 (bottom sequence). These results confirm that the two nonsense mutations are located in distinct alleles (biallelic mutations).

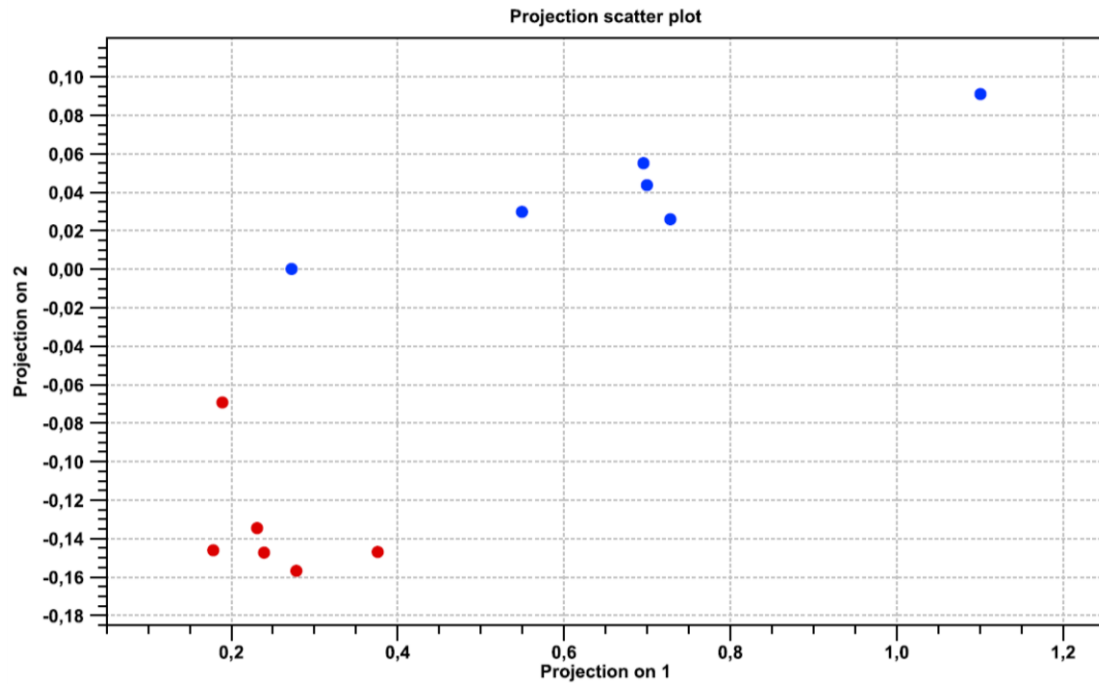

**Supplementary Figure 3:** Principal component analysis of global miRNAs expression levels. A combination of PC2 with PC1 allowed a linear separation between *DROSHA*-E1147K mutated (red circles) and non-mutated (blue circles) tumors.

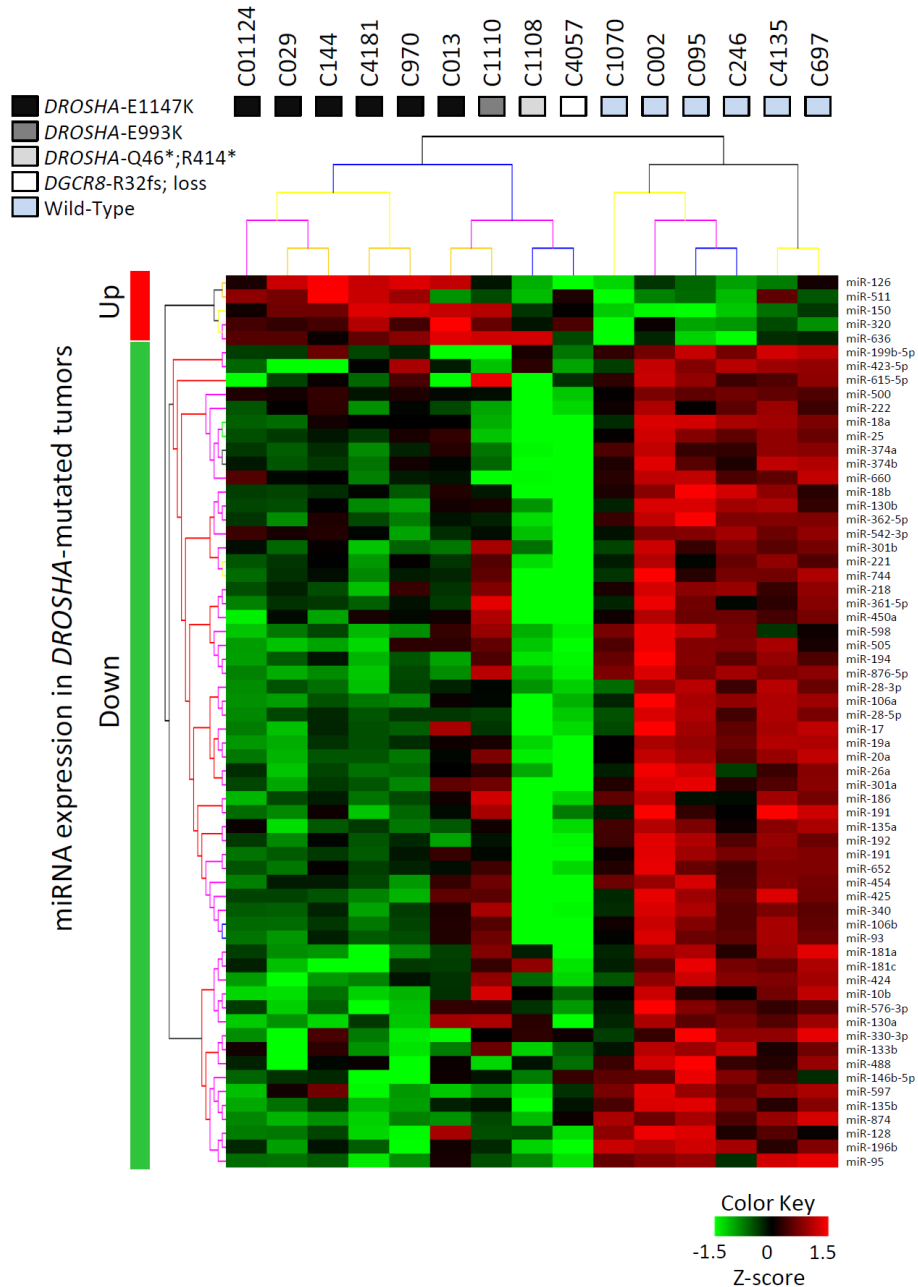

**Supplementary Figure 4:** Unsupervised hierarchical clustering analysis. The expression profile of 64 miRNAs affected by *DROSHA*-E1147K mutation were investigated in three additional WT samples with other mutations in *DROSHA* or *DGCR8* genes (COG\_1110: *DROSHA* homozygous E993K; COG\_1108: two nonsense mutations in *DROSHA* – Q46\* and R414\* and COG\_4057: *DGCR8* frameshift and genomic loss). Clustering analysis confidently separated miRNA core genes mutated samples from non-mutated samples. Interestingly, the two tumors with double hits (COG\_1108 and COG\_4057) presented a more distinct miRNA expression profile, showing a remarkable lower expression of the affected miRNAs.

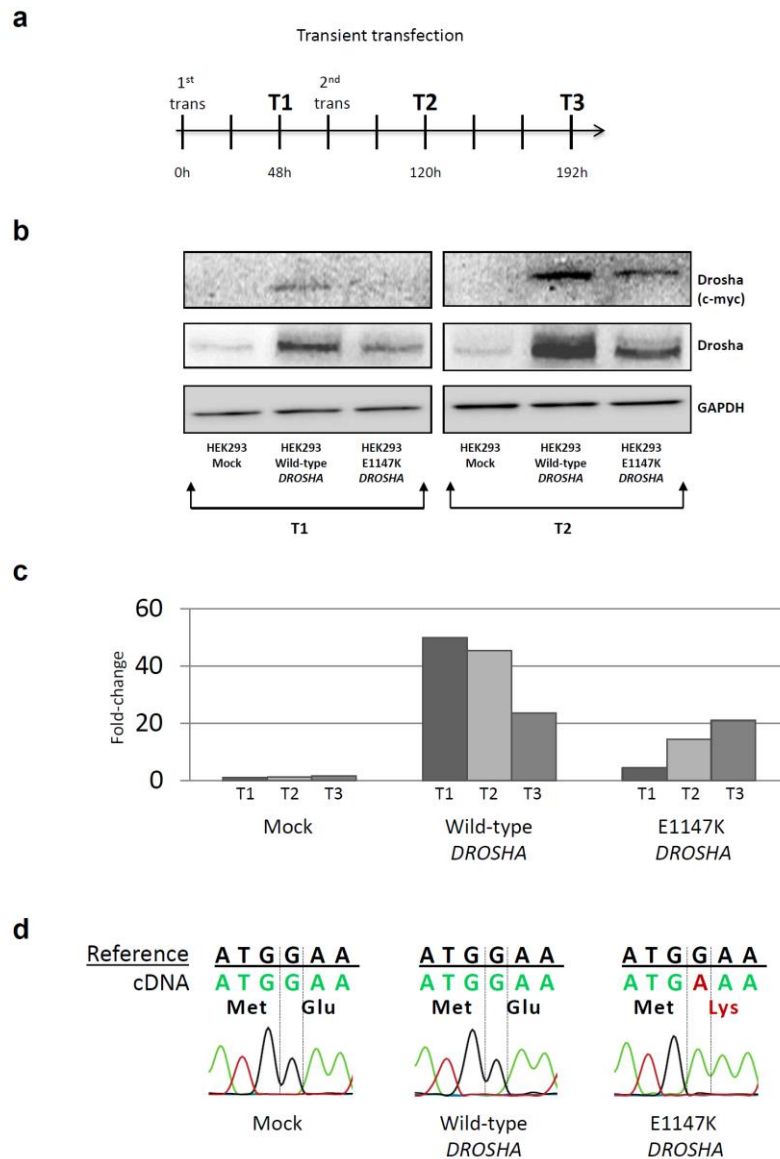

**Supplementary Figure 5:** Validation of plasmids expression in HEK293 wild-type and E1147K *DROSHA* transiently transfected cells. **(a)** Schematic representation of the time course experiment: transfections were performed twice in a 72-h interval (1<sup>st</sup> trans and 2<sup>nd</sup> trans); cell extracts were collected at three time points (T1, T2 and T3). **(b)** Expression of proteins extracted from HEK293 transfected with mock, wild-type *DROSHA*, and E1147K *DROSHA* plasmids were analyzed by Western blotting using anti-c-Myc antibody targeted against plasmids (pcDNA4/TO/cmycDrosha). GAPDH antibody was used as a control. In first transfection (T1), densitometry quantification of WB bands resulted in normalized Drossha expression value (calculated by *DROSHA*/GAPDH ratio) of 0.27 for mock, 3.42 for wild-type, and 1.25 for E1147K transfected cells. In second transfection (T2), normalized Drossha expression was 0.40 for mock, 4.90 for wild-type, and 3.49 for E1147K transfected cells. **(c)** RT-qPCR was performed for confirming *DROSHA* over-expression in wild-type and E1147K *DROSHA* transfected cells. *DROSHA*

expression in times T1, T2, and T3 of the three transfection conditions are presented as fold-changes normalized by the expression of HEK293 mock cells (T1). **(d)** Sanger sequencing of cDNA from T3 time point of mock, wild-type *DROSHA*, and E1147K *DROSHA* transfected cells showing the expression of the mutated transcript in E1147K cells.

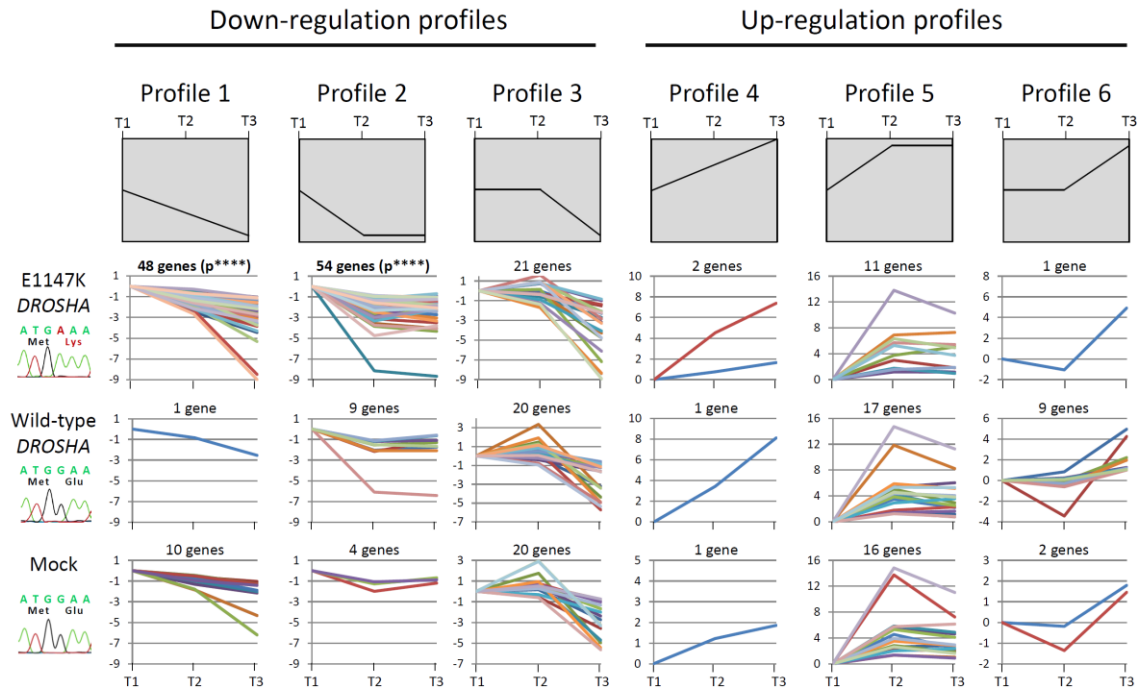

**Supplementary Figure 6:** STEM result of time course experiment in HEK2993 cells expressing wild-type or E1147K Drosha. STEM analysis was used for clustering and analyzing the expression data. Plasmid transfections were performed twice in HEK2993 cells in a 72-h interval and miRNA expression levels were measured at three time points using the TaqMan Array platform (T1, T2 and T3). Top panel presents the three possible down-regulation and the three possible up-regulation profiles produced by STEM analysis. It shows that E1147K-transfected cells presented two statistically significant profiles (profiles 1 and 2) harboring more genes (48 and 54, respectively) than expected by chance. These two profiles are those that represent a reduction of mature miRNA levels from time point 1 to 3.

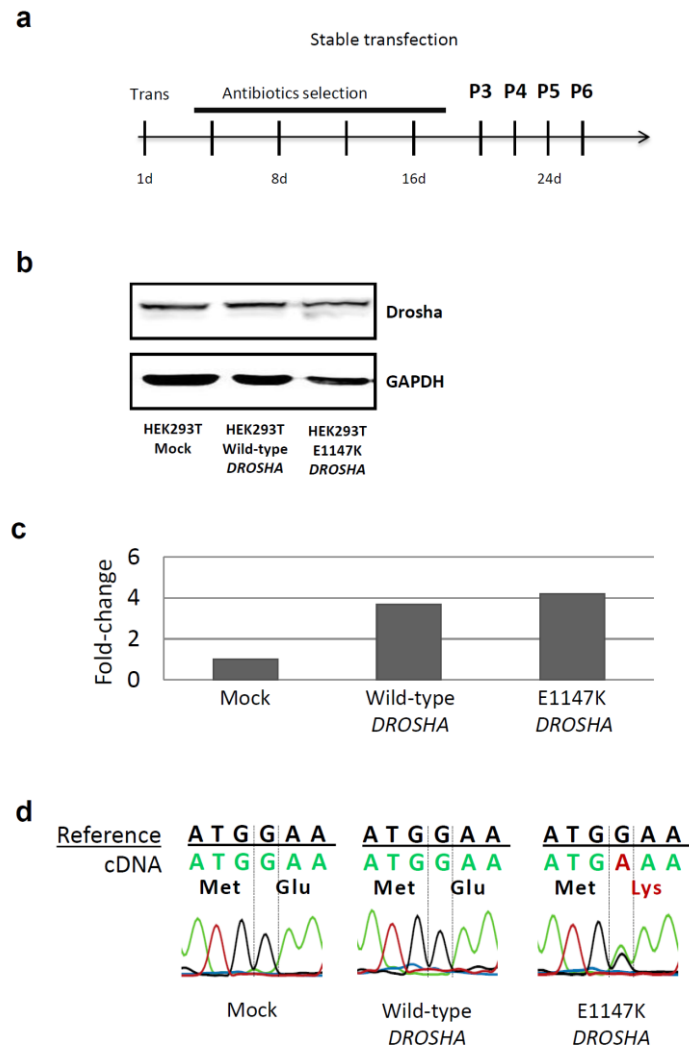

**Supplementary Figure 7:** Validation of plasmids expression in HEK293T wild-type and E1147K *DROSHA* stably transfected cells. **(a)** Schematic representation of the experiment, showing the time length of selection and the passages when cell extracts were collected for miRNA expression analysis. **(b)** Expression of proteins extracted from HEK293T transfected with mock, wild-type *DROSHA*, and E1147K *DROSHA* plasmids were analyzed by Western blotting using anti-Droscha (WB with anti-c-Myc antibody did not result in reliable results due to the low expression of exogenous protein in this assay). GAPDH antibody was used as a control. Densitometry quantification of WB bands resulted in normalized Droscha expression value (calculated by *DROSHA*/GAPDH ratio) of 0.28 for mock, 0.46 for wild-type, and 0.71 for E1147K stably transfected cells. **(c)** *DROSHA* expression of the three stable cell lines was assessed by RT-qPCR and is presented as fold-changes normalized by the expression of HEK293T mock cells. **(d)** Sanger sequencing of cDNA from mock, wild-type *DROSHA*, and E1147K *DROSHA* stably transfected cells showing the heterozygous expression of the mutated transcript in E1147K-stably transfected cells.



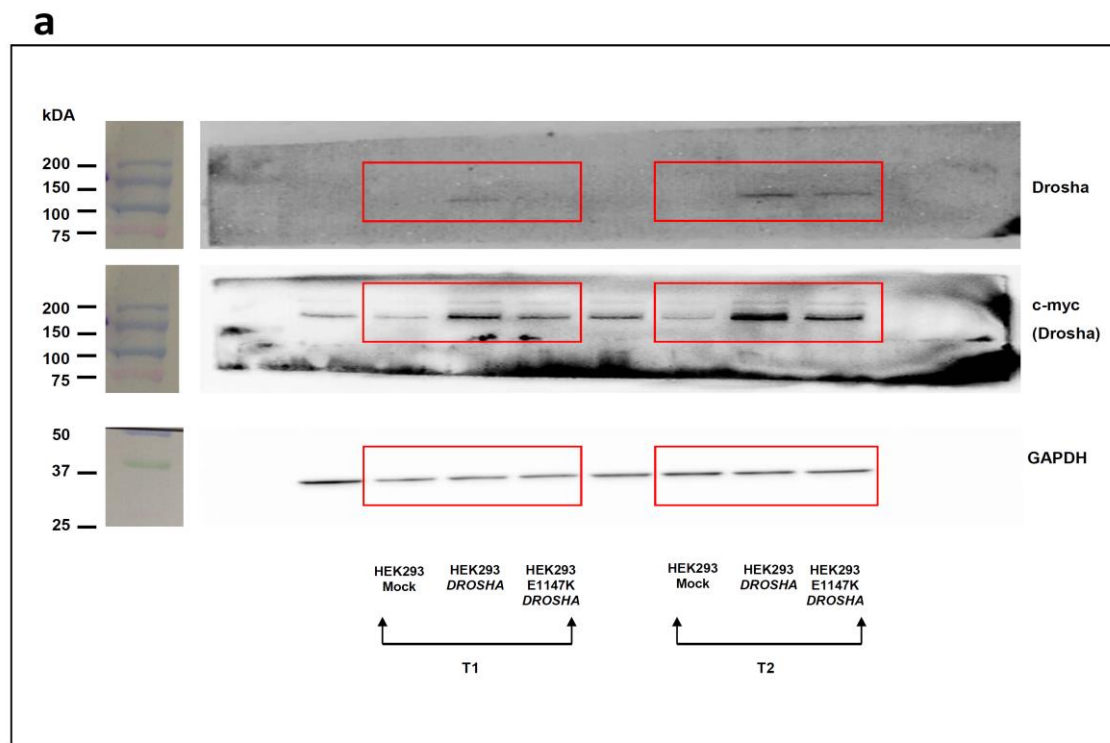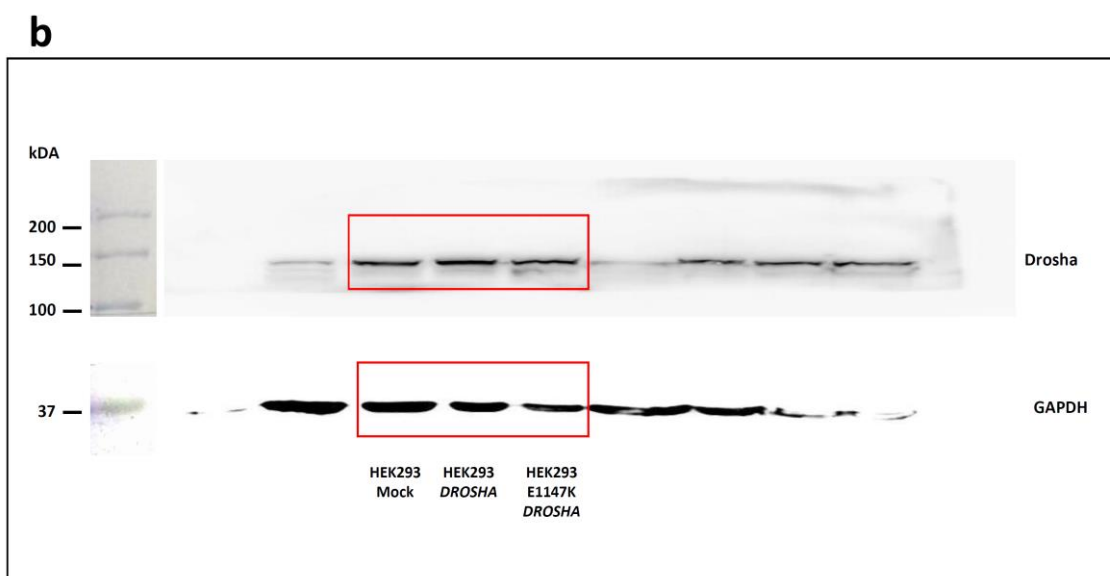

**Supplementary Figure 8:** Full pictures of western blots presented in the manuscript. Red boxed regions correspond to cropped fragment used in the figures. **(a)** Western blot from transient transfection experiment. **(b)** Western blot from stably transfection experiment.

## SUPPLEMENTARY TABLES

**Supplementary Table 1: Sequence coverage by WES.**

| Sample         | Total reads | % of mapped reads (hg19) | Target coverage | Mean coverage depth | Targets covered >20X | Reads on target |
|----------------|-------------|--------------------------|-----------------|---------------------|----------------------|-----------------|
| <b>ACC_12T</b> | 194,425,183 | 40.4%                    | 90.58%          | 41X                 | 48.3%                | 76.9%           |
| <b>ACC_12B</b> | 620,978,245 | 47.9%                    | 93.68%          | 178X                | 73.4%                | 72.9%           |
| <b>ACC_12M</b> | 431,293,170 | 45.5%                    | 93.42%          | 122X                | 72.3%                | 76.3%           |
| <b>ACC_12F</b> | 288,505,016 | 55.3%                    | 93.18%          | 100X                | 73.4%                | 75.0%           |

ACC = sample obtained from AC Camargo Cancer Center; 12T = index case tumor DNA; 12B = proband germline DNA; 12M = proband's mother germline DNA; 12F = proband's father germline DNA.

**Supplementary Table 2: Somatic SNVs and indels identified by WES.**

| Chrom         | Position        | Ref base | Var base | Cov Ref   | Cov Var  | Strand   | Allele              | Freq        | Gene                 | Codon Ref  | Codon Var  | aa Ref   | aa Var   | Alteration type      | Sanger Validation |
|---------------|-----------------|----------|----------|-----------|----------|----------|---------------------|-------------|----------------------|------------|------------|----------|----------|----------------------|-------------------|
| <b>SNVs</b>   |                 |          |          |           |          |          |                     |             |                      |            |            |          |          |                      |                   |
| Chr19         | 52537713        | C        | T        | 24        | 8        | +/-      | Heterozygous        | 33.3        | <i>ZNF432</i>        | GGA        | AGA        | G        | R        | Nonsynonymous        | Not confirmed     |
| Chr8          | 110463332       | A        | C        | 28        | 6        | +        | Heterozygous        | 21.4        | <i>PKHD1L1</i>       | AGT        | CGT        | S        | R        | Nonsynonymous        | Not confirmed     |
| Chr12         | 11286336        | T        | G        | 29        | 5        | +/-      | Heterozygous        | 17.2        | <i>TAS2R30</i>       | AGT        | CGT        | S        | R        | Nonsynonymous        | Not confirmed     |
| <b>Chr5</b>   | <b>31421465</b> | <b>C</b> | <b>T</b> | <b>32</b> | <b>5</b> | <b>-</b> | <b>Heterozygous</b> | <b>15.6</b> | <b><i>DROSHA</i></b> | <b>GAA</b> | <b>AAA</b> | <b>E</b> | <b>K</b> | <b>Nonsynonymous</b> | <b>Validated</b>  |
| ChrX          | 12906217        | T        | C        | 26        | 5        | +        | Heterozygous        | 19.2        | <i>TLR7</i>          | TTC        | CTC        | F        | L        | Nonsynonymous        | Not confirmed     |
| <b>Indels</b> |                 |          |          |           |          |          |                     |             |                      |            |            |          |          |                      |                   |
| Chr1          | 7858661         | C        | CGA      | 15        | 3        | -        | Heterozygous        | 20.0        | <i>PER3</i>          | -          | -          | -        | -        | Frameshift           | NE                |
| Chr8          | 56699534        | T        | TG       | 14        | 5        | +        | Heterozygous        | 35.7        | <i>TGS1</i>          | -          | -          | -        | -        | Frameshift           | NE                |
| Chr22         | 26769476        | A        | AA       | 8         | 3        | +/-      | Heterozygous        | 37.5        | <i>SEZ6L</i>         | -          | -          | -        | -        | Frameshift           | NE                |
| Chr6          | 57398190        | A        | AA       | 32        | 9        | +/-      | Heterozygous        | 28.1        | <i>PRIM2</i>         | -          | -          | -        | -        | Frameshift           | NE                |
| Chr2          | 46711400        | G        | GG       | 7         | 3        | +        | Heterozygous        | 42.9        | <i>LOC388946</i>     | -          | -          | -        | -        | Frameshift           | NE                |

Chr = chromosome; Ref = reference base; Var = variant base; Cov = coverage; Freq = frequency of variant base; aa = Amino acid; NE = not-evaluated. Validated *DROSHA* E1147K mutation is represented in bold letters.

**Supplementary Tables 3a, b and c:** Clinical features of investigated cohorts. Mutated samples are highlighted in bold letters.

**a) Fresh-frozen COG cohort**

| <b>ID</b>              | <b>Predominant histologic pattern</b> | <b>Stage</b>     | <b>Relapse</b>    | <b>QTneo</b>     |
|------------------------|---------------------------------------|------------------|-------------------|------------------|
| <b>COG1_13</b>         | <b>Blastema</b>                       | <b>III</b>       | <b>No</b>         | <b>No</b>        |
| <b>COG1_29</b>         | <b>Blastema</b>                       | <b>IV</b>        | <b>No</b>         | <b>No</b>        |
| <b>COG_1110</b>        | <b>Blastema</b>                       | <b>IV</b>        | <b>No</b>         | <b>No</b>        |
| <b>COG_1124</b>        | <b>Blastema</b>                       | <b>III</b>       | <b>No</b>         | <b>No</b>        |
| <b>COG_1144</b>        | <b>Blastema</b>                       | <b>IV</b>        | <b>No</b>         | <b>No</b>        |
| <b>COG_128</b>         | <b>Blastema</b>                       | <b>III</b>       | <b>Yes</b>        | <b>No</b>        |
| <b>COG_4181</b>        | <b>Blastema</b>                       | <b>III</b>       | <b>No</b>         | <b>No</b>        |
| <b>COG_970</b>         | <b>Blastema</b>                       | <b>III</b>       | <b>Yes</b>        | <b>No</b>        |
| <b>COG_526</b>         | <b>Blastema</b>                       | <b>II</b>        | <b>Yes</b>        | <b>No</b>        |
| <b><u>COG_1108</u></b> | <b><u>Blastema</u></b>                | <b><u>II</u></b> | <b><u>Yes</u></b> | <b><u>No</u></b> |
| COG1_1                 | Blastema                              | III              | Yes               | No               |
| COG1_10                | Blastema                              | III              | No                | No               |
| COG1_12                | Blastema                              | III              | No                | No               |
| COG1_14                | Blastema                              | III              | No                | No               |
| COG1_15                | Blastema                              | III              | No                | No               |
| COG1_17                | Blastema                              | III              | No                | No               |
| COG1_18                | Blastema                              | III              | No                | No               |
| COG1_19                | Blastema                              | IV               | Yes               | No               |
| COG1_2                 | Blastema                              | III              | Yes               | No               |
| COG1_20                | Blastema                              | IV               | Yes               | No               |
| COG1_21                | Blastema                              | IV               | Yes               | No               |
| COG1_22                | Blastema                              | IV               | Yes               | No               |
| COG1_23                | Blastema                              | IV               | Yes               | No               |
| COG1_24                | Blastema                              | IV               | Yes               | No               |
| COG1_25                | Blastema                              | IV               | No                | No               |
| COG1_26                | Blastema                              | IV               | No                | No               |
| COG1_27                | Blastema                              | IV               | No                | No               |
| COG1_28                | Blastema                              | IV               | No                | No               |
| COG1_30                | Blastema                              | IV               | No                | No               |
| COG1_4                 | Blastema                              | III              | Yes               | No               |
| COG1_5                 | Blastema                              | III              | Yes               | No               |
| COG1_7                 | Blastema                              | III              | Yes               | No               |
| COG1_8                 | Blastema                              | III              | Yes               | No               |
| COG1_9                 | Blastema                              | III              | Yes               | No               |
| COG_001                | Blastema                              | III              | No                | No               |
| COG_002                | Blastema                              | III              | Yes               | No               |
| COG_031                | Blastema                              | IV               | No                | No               |
| COG_032                | Blastema                              | III              | No                | No               |

|          |          |     |     |    |
|----------|----------|-----|-----|----|
| COG_095  | Blastema | III | No  | No |
| COG_1060 | Blastema | IV  | No  | No |
| COG_1065 | Blastema | III | No  | No |
| COG_1068 | Blastema | IV  | No  | No |
| COG_1070 | Blastema | IV  | No  | No |
| COG_1099 | Blastema | III | No  | No |
| COG_1104 | Blastema | I   | Yes | No |
| COG_1088 | Blastema | III | No  | No |
| COG_117  | Blastema | IV  | Yes | No |
| COG_1232 | Blastema | III | Yes | No |
| COG_1247 | Blastema | IV  | No  | No |
| COG_1290 | Blastema | III | No  | No |
| COG_178  | Blastema | IV  | No  | No |
| COG_201  | Blastema | III | Yes | No |
| COG_2050 | Blastema | III | No  | No |
| COG_2063 | Blastema | III | No  | No |
| COG_2081 | Blastema | III | No  | No |
| COG_2113 | Blastema | IV  | No  | No |
| COG_2182 | Blastema | III | No  | No |
| COG_219  | Blastema | III | Yes | No |
| COG_246  | Blastema | III | No  | No |
| COG_277  | Blastema | II  | Yes | No |
| COG_321  | Blastema | IV  | No  | No |
| COG_329  | Blastema | IV  | No  | No |
| COG_341  | Blastema | II  | Yes | No |
| COG_342  | Blastema | IV  | Yes | No |
| COG_353  | Blastema | III | No  | No |
| COG_396  | Blastema | IV  | Yes | No |
| COG_399  | Blastema | III | No  | No |
| COG_4057 | Blastema | III | Yes | No |
| COG_4094 | Blastema | III | No  | No |
| COG_4135 | Blastema | IV  | No  | No |
| COG_4159 | Blastema | III | No  | No |
| COG_4196 | Blastema | IV  | No  | No |
| COG_420  | Blastema | III | Yes | No |
| COG_4272 | Blastema | III | No  | No |
| COG_4305 | Blastema | III | No  | No |
| COG_472  | Blastema | IV  | No  | No |
| COG_495  | NA       | NA  | NA  | No |
| COG_497  | Blastema | II  | Yes | No |
| COG_575  | Blastema | IV  | No  | No |
| COG_6000 | Blastema | III | No  | No |
| COG_6011 | Blastema | III | Yes | No |
| COG_697  | Blastema | II  | Yes | No |

**b) Fresh-frozen ACC cohort**

| ID            | Predominant histologic pattern | Stage     | Relapse    | QTneo      |
|---------------|--------------------------------|-----------|------------|------------|
| <b>ACC_08</b> | <b>Biphasic - B+E</b>          | <b>II</b> | <b>No</b>  | <b>Yes</b> |
| <b>ACC_12</b> | <b>Biphasic - E+B</b>          | <b>I</b>  | <b>Yes</b> | <b>Yes</b> |
| ACC_01        | Stromal                        | V         | Yes        | Yes        |
| ACC_02        | NA                             | NA        | NA         | NA         |
| ACC_04        | Nephrogenic rests              | V         | No         | Yes        |
| ACC_05        | Stromal                        | III       | No         | Yes        |
| ACC_06        | Triphasic                      | I         | No         | Yes        |
| ACC_07        | Triphasic                      | III       | No         | Yes        |
| ACC_10        | Diffuse Anaplasia              | II        | No         | Yes        |
| ACC_13        | Stromal                        | II        | No         | Yes        |
| ACC_15        | Blastema                       | III       | Yes        | Yes        |
| ACC_17        | Blastema                       | V         | No         | Yes        |
| ACC_19        | Epithelial                     | NA        | NA         | NA         |
| ACC_20        | Triphasic                      | III       | No         | Yes        |
| ACC_21        | Triphasic                      | III       | No         | Yes        |

**c) FFPE ACC cohort**

| ID              | Predominant histologic pattern | Stage      | Relapse   | QTneo      |
|-----------------|--------------------------------|------------|-----------|------------|
| <b>ACCp_19</b>  | <b>Blastema</b>                | <b>II</b>  | <b>No</b> | <b>No</b>  |
| <b>ACCp_34</b>  | <b>Blastema</b>                | <b>I</b>   | <b>No</b> | <b>No</b>  |
| <b>ACCp_37</b>  | <b>Blastema</b>                | <b>III</b> | <b>NA</b> | <b>Yes</b> |
| <b>ACCp_72</b>  | <b>Biphasic B+E</b>            | <b>NA</b>  | <b>NA</b> | <b>NA</b>  |
| <b>ACCp_74</b>  | <b>Biphasic B+E</b>            | <b>III</b> | <b>No</b> | <b>Yes</b> |
| <b>ACCp_76</b>  | <b>Triphasic</b>               | <b>I</b>   | <b>No</b> | <b>No</b>  |
| <b>ACCp_84</b>  | <b>Blastema</b>                | <b>II</b>  | <b>No</b> | <b>No</b>  |
| <b>ACCp_100</b> | <b>NA</b>                      | <b>I</b>   | <b>No</b> | <b>No</b>  |
| <b>ACCp_101</b> | <b>Triphasic</b>               | <b>III</b> | <b>No</b> | <b>No</b>  |
| <b>ACCp_102</b> | <b>Biphasic S+E; Rhab diff</b> | <b>III</b> | <b>No</b> | <b>Yes</b> |
| <b>ACCp_115</b> | <b>Epithelial</b>              | <b>I</b>   | <b>No</b> | <b>No</b>  |
| <b>ACCp_136</b> | <b>Blastema</b>                | <b>I</b>   | <b>No</b> | <b>No</b>  |
| <b>ACCp_151</b> | <b>Tubular diff</b>            | <b>I</b>   | <b>No</b> | <b>No</b>  |
| <b>ACCp_154</b> | <b>Blastema</b>                | <b>III</b> | <b>NA</b> | <b>No</b>  |
| ACCp_6          | Biphasic B+E                   | II         | No        | No         |
| ACCp_10         | Biphasic B+E                   | I          | No        | No         |
| ACCp_11         | Biphasic B+E                   | II         | No        | Yes        |
| ACCp_12         | Blastema                       | III        | Yes       | No         |
| ACCp_13         | NA                             | NA         | NA        | NA         |
| ACCp_14         | Blastema                       | II         | No        | No         |

|         |                  |     |     |     |
|---------|------------------|-----|-----|-----|
| ACCp_15 | Triphasic        | V   | Yes | Yes |
| ACCp_17 | NA               | I   | No  | No  |
| ACCp_18 | Blastema         | II  | No  | No  |
| ACCp_21 | Undifferentiated | III | Yes | No  |
| ACCp_23 | NA               | II  | Yes | Yes |
| ACCp_24 | Biphasic B+E     | II  | No  | No  |
| ACCp_25 | NA               | NA  | NA  | NA  |
| ACCp_26 | Focal Anaplasia  | II  | Yes | Yes |
| ACCp_27 | Triphasic        | I   | No  | Yes |
| ACCp_29 | Triphasic        | II  | No  | No  |
| ACCp_32 | Epithelial       | I   | No  | No  |
| ACCp_33 | NA               | NA  | NA  | NA  |
| ACCp_36 | Tubular Diff     | IV  | Yes | No  |
| ACCp_38 | Triphasic        | I   | No  | No  |
| ACCp_39 | Triphasic        | IV  | No  | Yes |
| ACCp_41 | Triphasic        | II  | Yes | Yes |
| ACCp_42 | Epithelial       | II  | No  | No  |
| ACCp_44 | NA               | II  | Yes | No  |
| ACCp_46 | NA               | III | No  | Yes |
| ACCp_47 | Triphasic        | III | No  | Yes |
| ACCp_48 | Triphasic        | III | No  | No  |
| ACCp_52 | Triphasic        | I   | No  | No  |
| ACCp_53 | Triphasic        | II  | No  | No  |
| ACCp_54 | Triphasic        | III | No  | No  |
| ACCp_55 | Blastema         | I   | No  | No  |
| ACCp_57 | NA               | NA  | NA  | NA  |
| ACCp_58 | Epithelial       | III | No  | No  |
| ACCp_59 | Blastema         | III | Yes | Yes |
| ACCp_60 | Blastema         | III | Yes | Yes |
| ACCp_61 | Blastema         | I   | No  | No  |
| ACCp_63 | Triphasic        | III | No  | No  |
| ACCp_65 | Blastema         | I   | No  | No  |
| ACCp_68 | Triphasic        | III | No  | No  |
| ACCp_70 | Blastema         | II  | No  | No  |
| ACCp_71 | Blastema         | IV  | Yes | NA  |
| ACCp_73 | Epithelial       | I   | No  | No  |
| ACCp_75 | Triphasic        | I   | No  | No  |
| ACCp_78 | Blastema         | IV  | No  | Yes |
| ACCp_79 | Triphasic        | III | No  | Yes |
| ACCp_80 | Triphasic        | IV  | No  | No  |
| ACCp_81 | Stromal          | II  | Yes | No  |
| ACCp_82 | NA               | IV  | No  | No  |
| ACCp_83 | NA               | NA  | NA  | NA  |
| ACCp_86 | NA               | IV  | Yes | Yes |
| ACCp_87 | Triphasic        | I   | No  | No  |

|          |                       |     |     |     |
|----------|-----------------------|-----|-----|-----|
| ACCp_88  | Triphasic             | III | No  | No  |
| ACCp_89  | Triphasic             | IV  | No  | Yes |
| ACCp_90  | Triphasic             | I   | No  | No  |
| ACCp_91  | Triphasic             | I   | No  | No  |
| ACCp_93  | Triphasic             | III | Yes | Yes |
| ACCp_94  | NA                    | IV  | No  | Yes |
| ACCp_95  | Blastema              | I   | No  | No  |
| ACCp_96  | NA                    | III | Yes | No  |
| ACCp_97  | Stromal               | II  | No  | Yes |
| ACCp_99  | NA                    | NA  | NA  | NA  |
| ACCp_103 | Blastema              | II  | No  | No  |
| ACCp_104 | Blastema              | III | No  | No  |
| ACCp_105 | NA                    | III | No  | Yes |
| ACCp_107 | Blastema              | III | No  | Yes |
| ACCp_108 | Blastema              | III | Yes | No  |
| ACCp_109 | Blastema              | V   | Yes | Yes |
| ACCp_110 | Blastema              | I   | No  | Yes |
| ACCp_111 | Triphasic             | I   | No  | No  |
| ACCp_112 | NA                    | III | No  | Yes |
| ACCp_113 | Blastema              | II  | Yes | No  |
| ACCp_116 | Blastema              | II  | Yes | No  |
| ACCp_117 | NA                    | V   | Yes | Yes |
| ACCp_118 | Stromal               | V   | Yes | Yes |
| ACCp_119 | Blastema              | II  | No  | No  |
| ACCp_120 | Triphasic             | I   | Yes | No  |
| ACCp_121 | Blastema              | III | Yes | No  |
| ACCp_123 | Blastema              | I   | No  | No  |
| ACCp_124 | Blastema              | I   | No  | No  |
| ACCp_125 | Blastema              | I   | No  | No  |
| ACCp_126 | Stromal               | III | Yes | Yes |
| ACCp_127 | Blastema              | III | No  | No  |
| ACCp_128 | Triphasic             | II  | No  | No  |
| ACCp_130 | Blastema              | II  | No  | No  |
| ACCp_131 | Blastema              | III | Yes | No  |
| ACCp_132 | Blastema              | IV  | No  | Yes |
| ACCp_133 | NA                    | II  | No  | Yes |
| ACCp_134 | Blastema              | III | NA  | Yes |
| ACCp_135 | Blastema              | III | Yes | No  |
| ACCp_137 | Epithelial            | I   | No  | No  |
| ACCp_138 | Epithelial            | I   | No  | No  |
| ACCp_139 | Stromal               | V   | Yes | Yes |
| ACCp_140 | Stromal               | V   | Yes | Yes |
| ACCp_141 | Biphasic S+E          | I   | No  | Yes |
| ACCp_142 | Stromal               | V   | No  | Yes |
| ACCp_143 | Cystic nephroblastoma | I   | No  | Yes |



|          |                 |     |     |     |
|----------|-----------------|-----|-----|-----|
| ACCp_144 | NA              | III | No  | Yes |
| ACCp_145 | Blastema        | IV  | No  | Yes |
| ACCp_146 | Biphasic B+E    | I   | No  | No  |
| ACCp_147 | Biphasic B+E    | I   | No  | No  |
| ACCp_148 | Focal Anaplasia | II  | No  | No  |
| ACCp_149 | Blastema        | II  | No  | No  |
| ACCp_150 | Tubular Diff    | II  | No  | No  |
| ACCp_152 | Blastema        | II  | No  | No  |
| ACCp_153 | Blastema        | II  | No  | No  |
| ACCp_155 | Blastema        | III | No  | No  |
| ACCp_156 | Rhabdoide Tumor | III | Yes | Yes |
| ACCp_159 | Blastema        | IV  | Yes | Yes |
| ACCp_160 | Blastema        | V   | Yes | Yes |
| ACCp_161 | Blastema        | II  | No  | No  |

QTneo = neoadjuvant chemotherapy; NA = information not available; B = blastema; E = epithelial; S = stromal; Diff = differentiation; Rhab Diff = rhabdomyoblastic differentiation

**Supplementary Table 4.** Description of point mutations detected in miRNA core processing genes and WT-associated genes by targeted sequencing in 66 WT frozen samples. Genomic imbalances detected in the same genes displaying point mutations in any of the samples are also shown (10 samples). Clinical characteristics, such as the predominant histology of each tumor, clinical stage, the occurrence of relapse and the use of neoadjuvant chemotherapy are described.

| ID       | Point mutations                                                    | Genomic imbalances                  | Predominant Histology | Stage | Relapse | QTneo |
|----------|--------------------------------------------------------------------|-------------------------------------|-----------------------|-------|---------|-------|
| ACC_8    | <i>DROSHA</i> p.E1147K;<br><i>TP53</i> p.P72A; <i>FBXW7</i> p.R35C |                                     | Biphasic - Blastema   | II    | No      | Yes   |
| COG_4181 | <i>DROSHA</i> p.E1147K                                             | <i>WT1</i> loss                     | Blastema              | III   | No      | No    |
| COG_1124 | <i>DROSHA</i> p.E1147K                                             | <i>WT1</i> loss                     | Blastema              | III   | No      | No    |
| COG_970  | <i>DROSHA</i> p.E1147K                                             | <i>WT1</i> loss                     | Blastema              | III   | Yes     | No    |
| COG_1144 | <i>DROSHA</i> p.E1147K                                             |                                     | Blastema              | IV    | No      | No    |
| ACC_12   | <i>DROSHA</i> p.E1147K                                             |                                     | Biphasic - Epithelial | I     | Yes     | Yes   |
| COG_128  | <i>DROSHA</i> p.E1147K                                             |                                     | Blastema              | III   | Yes     | No    |
| COG_1110 | <i>DROSHA</i> p.E1147K                                             |                                     | Blastema              | IV    | No      | No    |
| COG_526  | <i>DROSHA</i> p.P211T                                              | <i>WT1</i> loss                     | Blastema              | II    | Yes     | No    |
| COG_1108 | <i>DROSHA</i> p.Q46*;<br><i>DROSHA</i> p.R414*                     |                                     | Blastema              | II    | Yes     | No    |
| COG_032  | <i>DGCR8</i> p.E518K;<br><i>FBXW7</i> p.E117del                    | <i>DGCR8</i> loss                   | Blastema              | III   | No      | No    |
| COG_353  | <i>DGCR8</i> p.Y721H                                               | <i>WTX</i> loss; <i>DIS3L2</i> loss | Blastema              | III   | No      | No    |
| COG_219  | <i>DGCR8</i> p.S92R                                                |                                     | Blastema              | III   | Yes     | No    |
| COG_4159 | <i>DGCR8</i> p.A558T                                               |                                     | Blastema              | III   | No      | No    |
| ACC_15   | <i>DGCR8</i> p.G55S                                                | NA                                  | Blastema              | III   | Yes     | Yes   |
| COG_4057 | <i>DGCR8</i> p.R32fs                                               | <i>DGCR8</i> loss                   | Blastema              | III   | Yes     | No    |

|          |                                                                     |                                                             |                     |     |     |     |
|----------|---------------------------------------------------------------------|-------------------------------------------------------------|---------------------|-----|-----|-----|
| COG_117  | <i>DICER1</i> p.I85M; <i>WT1</i> p.P183fs;<br><i>CTNNB1</i> P.Y333F |                                                             | Blastema            | IV  | Yes | No  |
| ACC_13   | <i>DICER1</i> p.D1810N                                              | NA                                                          | Stromal             | II  | No  | Yes |
| COG_396  | <i>DICER1</i> p.Q48E                                                |                                                             | Blastema            | IV  | Yes | No  |
| ACC_4    | <i>XPO5</i> p.V832I;<br><i>TARBP2</i> p.R296H                       | NA                                                          | Nephrogenic rests   | V   | No  | Yes |
| COG_2050 | <i>TARBP2</i> p.R353fs                                              |                                                             | Blastema            | III | No  | No  |
| ACC_5    | <i>CTNNB1</i> p.T41A;<br><i>WT1</i> p.D367_splice                   |                                                             | Stromal             | III | No  | Yes |
| ACC_7    | <i>CTNNB1</i> p.N387K                                               | NA                                                          | Triphasic - Stromal | III | No  | Yes |
| ACC_1    | <i>CTNNB1</i> p.S45F                                                | NA                                                          | Stromal             | V   | Yes | Yes |
| COG_2081 | <i>CTNNB1</i> p.S45P                                                | <i>XPO5</i> gain; <i>TARBP2</i> gain;<br><i>DIS3L2</i> gain | Blastema            | III | No  | No  |
| COG_6000 | <i>WT1</i> p.F391fs;<br><i>WT1</i> p.K316fs                         |                                                             | Blastema            | III | No  | No  |
| COG_1290 | <i>WT1</i> p.V379fs                                                 |                                                             | Blastema            | III | No  | No  |
| COG_031  | <i>WTX</i> p.D354fs                                                 | <i>CTNNB1</i> gain                                          | Blastema            | IV  | No  | No  |
| COG_4135 | <i>WTX</i> p.R353*                                                  |                                                             | Blastema            | IV  | No  | No  |
| COG_1065 | <i>WTX</i> p.R497*                                                  |                                                             | Blastema            | III | No  | No  |
| ACC_10   | <i>TP53</i> p.339_340EM>V                                           | NA                                                          | Anaplasia           | II  | No  | Yes |
| COG_497  | <i>DIS3L2</i> p.Q230*                                               |                                                             | Blastema            | II  | Yes | No  |
| COG_4196 | <i>DIS3L2</i> p.R483G                                               |                                                             | Blastema            | IV  | No  | No  |
| COG_321  |                                                                     | <i>DICER1</i> loss                                          | Blastema            | IV  | No  | No  |
| COG_1232 |                                                                     | <i>DICER1</i> gain; <i>FBXW7</i> loss                       | Blastema            | III | Yes | No  |
| COG_246  |                                                                     | <i>DICER1</i> loss                                          | Blastema            | III | No  | No  |
| COG_4272 |                                                                     | <i>XPO5</i> gain; <i>TARBP2</i> gain;<br><i>WTX</i> loss    | Blastema            | III | No  | No  |
| COG_4305 |                                                                     | <i>XPO5</i> gain; <i>TARBP2</i> gain                        | Blastema            | III | No  | No  |
| COG_420  |                                                                     | <i>XPO5</i> gain; <i>TARBP2</i> gain                        | Blastema            | III | Yes | No  |
| COG_1104 |                                                                     | <i>XPO5</i> gain                                            | Blastema            | I   | Yes | No  |

|          |                                  |          |     |     |    |
|----------|----------------------------------|----------|-----|-----|----|
| COG_201  | <i>WT1</i> loss; <i>WTX</i> loss | Blastema | III | Yes | No |
| COG_001  | <i>WTX</i> loss                  | Blastema | III | No  | No |
| COG_2113 | <i>DIS3L2</i> loss               | Blastema | IV  | No  | No |

QTneo = neoadjuvant chemotherapy; NA – not available.

**Supplementary Table 5:** Detailed description of point mutations detected by targeted sequencing in 66 WT frozen samples. Sequencing metrics, such as variant frequency and coverage, as well as pathogenicity prediction software results are described.

| ID       | Gene ID       | Chr | Position  | cDNA change     | Protein change | Var freq | Cov | Polyphen2 (score)         | SIFT (score)      | MutationTaster (score)     |
|----------|---------------|-----|-----------|-----------------|----------------|----------|-----|---------------------------|-------------------|----------------------------|
| ACC_8    | <i>DROSHA</i> | 5   | 31421465  | c.3439G>A       | p.E1147K       | 41.7     | 144 | probably damaging (1)     | damaging (0.001)  | disease causing (p> 0.999) |
|          | <i>TP53</i>   | 17  | 7579473   | c.214C>G        | p.P72A         | 7.8      | 51  | benign (0)                | tolerated (0.353) | polymorphism (p> 0.999)    |
|          | <i>FBXW7</i>  | 4   | 153332853 | c.103C>T        | p.R35C         | 49.4     | 87  | probably damaging (0.994) | damaging (0.000)  | disease causing (p> 0.999) |
| COG_4181 | <i>DROSHA</i> | 5   | 31421465  | c.3439G>A       | p.E1147K       | 51.4     | 208 | probably damaging (1)     | damaging (0.001)  | disease causing (p> 0.999) |
| COG_1124 | <i>DROSHA</i> | 5   | 31421465  | c.3439G>A       | p.E1147K       | 53.0     | 219 | probably damaging (1)     | damaging (0.001)  | disease causing (p> 0.999) |
| COG_970  | <i>DROSHA</i> | 5   | 31421465  | c.3439G>A       | p.E1147K       | 45.4     | 196 | probably damaging (1)     | damaging (0.001)  | disease causing (p> 0.999) |
| COG_1144 | <i>DROSHA</i> | 5   | 31421465  | c.3439G>A       | p.E1147K       | 47.8     | 46  | probably damaging (1)     | damaging (0.001)  | disease causing (p> 0.999) |
| ACC_12   | <i>DROSHA</i> | 5   | 31421465  | c.3439G>A       | p.E1147K       | 35.2     | 230 | probably damaging (1)     | damaging (0.001)  | disease causing (p> 0.999) |
| COG_128  | <i>DROSHA</i> | 5   | 31421465  | c.3439G>A       | p.E1147K       | 18.8     | 329 | probably damaging (1)     | damaging (0.001)  | disease causing (p> 0.999) |
| COG_1110 | <i>DROSHA</i> | 5   | 31435937  | c.2977G>A       | p.E993K        | 93.6     | 311 | probably damaging (1)     | damaging (0.001)  | disease causing (p> 0.999) |
| COG_526  | <i>DROSHA</i> | 5   | 31526409  | c.631C>A        | p.P211T        | 50.9     | 379 | benign (0)                | damaging (0.030)  | polymorphism (p> 0.999)    |
| COG_1108 | <i>DROSHA</i> | 5   | 31526904  | c.136C>T        | p.Q46*         | 43.5     | 269 |                           |                   |                            |
|          | <i>DROSHA</i> | 5   | 31515145  | c.1240C>T       | p.R414*        | 47.2     | 316 |                           |                   |                            |
| COG_032  | <i>DGCR8</i>  | 22  | 20079439  | c.1552G>A       | p.E518K        | 88.1     | 159 | probably damaging (1)     | damaging (0.002)  | disease causing (p> 0.999) |
|          | <i>FBXW7</i>  | 4   | 153332605 | c.349_351delGAG | p.E117del      | 44.4     | 342 |                           |                   |                            |
| COG_353  | <i>DGCR8</i>  | 22  | 20096449  | c.2161T>C       | p.Y721H        | 5.1      | 39  | possibly damaging (0.481) | tolerated (0.461) | disease causing (p> 0.999) |
| COG_219  | <i>DGCR8</i>  | 22  | 20073762  | c.276T>A        | p.S92R         | 40.6     | 165 | benign (0.148)            | damaging (0.003)  | disease causing (p> 0.999) |
| COG_4159 | <i>DGCR8</i>  | 22  | 20080397  | c.1672G>A       | p.A558T        | 7.8      | 205 | benign (0.151)            | damaging (0.004)  | disease causing (p> 0.999) |
| ACC_15   | <i>DGCR8</i>  | 22  | 20073649  | c.163G>A        | p.G55S         | 7.0      | 201 | probably damaging (1)     | damaging (0.000)  | disease causing (p> 0.999) |
| COG_4057 | <i>DGCR8</i>  | 22  | 20073569  | c.83_93dup      | p.R32fs        | 68.0     | 122 |                           |                   |                            |
| COG_117  | <i>DICER1</i> | 14  | 95598904  | c.255C>G        | p.I85M         | 51.0     | 727 | benign (0.047)            | tolerated (0.344) | disease causing (p> 0.999) |

|          |               |    |           |                   |               |      |     |                           |                   |                            |
|----------|---------------|----|-----------|-------------------|---------------|------|-----|---------------------------|-------------------|----------------------------|
|          | <i>WT1</i>    | 11 | 32456342  | c.549_550insTC    | p.P183fs      | 53.3 | 165 |                           |                   |                            |
|          | <i>CTNNB1</i> | 3  | 41268760  | c.998A>T          | p.Y333F       | 8.4  | 431 | probably damaging (0.992) | damaging (0.008)  | disease causing (p> 0.999) |
| ACC_13   | <i>DICER1</i> | 14 | 95557639  | c.5428G>A         | p.D1810N      | 91.8 | 195 | probably damaging (1)     | damaging (0.000)  | disease causing (p> 0.999) |
| COG_396  | <i>DICER1</i> | 14 | 95599654  | c.142C>G          | p.Q48E        | 48.9 | 233 | probably damaging (0.998) | tolerated (0.066) | disease causing (p> 0.999) |
| ACC_4    | <i>XPO5</i>   | 6  | 43499263  | c.2494G>A         | p.V832I       | 54.9 | 204 | benign (0.002)            | tolerated (0.437) | polymorphism (p> 0.999)    |
|          | <i>TARBP2</i> | 12 | 53899578  | c.887G>A          | p.R296H       | 51.0 | 102 | benign (0)                | tolerated (0.131) | polymorphism (p> 0.999)    |
| COG_2050 | <i>TARBP2</i> | 12 | 53899890  | c.1059delC        | p.R353fs      | 52.2 | 295 |                           |                   |                            |
| ACC_5    | <i>WT1</i>    | 11 | 32417935  | c.1099_splice     | p.D367_splice | 81.4 | 188 |                           |                   |                            |
|          | <i>CTNNB1</i> | 3  | 41266124  | c.121A>G          | p.T41A        | 48.0 | 204 | possibly damaging (0.94)  | damaging (0.003)  | disease causing (p> 0.999) |
| ACC_7    | <i>CTNNB1</i> | 3  | 41274911  | c.1161T>G         | p.N387K       | 44.8 | 669 | probably damaging (1)     | damaging (0.001)  | disease causing (p> 0.999) |
| ACC_1    | <i>CTNNB1</i> | 3  | 41266137  | c.134C>T          | p.S45F        | 55.3 | 94  | probably damaging (0.996) | damaging (0.000)  | disease causing (p> 0.999) |
| COG_2081 | <i>CTNNB1</i> | 3  | 41266136  | c.133T>C          | p.S45P        | 5.0  | 788 | probably damaging (0.988) | damaging (0.002)  | disease causing (p> 0.999) |
| COG_6000 | <i>WT1</i>    | 11 | 32439126  | c.946_947insAA    | p.K316fs      | 45.7 | 374 |                           |                   |                            |
|          | <i>WT1</i>    | 11 | 32417879  | c.1172_1173insC   | p.F391fs      | 27.2 | 279 |                           |                   |                            |
| COG_1290 | <i>WT1</i>    | 11 | 32417917  | c.1135delG        | p.V379fs      | 52.1 | 217 |                           |                   |                            |
| COG_031  | <i>WTX</i>    | X  | 63412106  | c.1061delA        | p.D354fs      | 45.7 | 324 |                           |                   |                            |
| COG_4135 | <i>WTX</i>    | X  | 63412110  | c.1057C>T         | p.R353*       | 91.7 | 36  |                           |                   |                            |
| COG_1065 | <i>WTX</i>    | X  | 63411678  | c.1489C>T         | p.R497*       | 8.2  | 110 |                           |                   |                            |
| ACC_10   | <i>TP53</i>   | 17 | 7574009   | c.1016_1018delAGA | p.339_340EM>V | 82.1 | 123 |                           |                   |                            |
| COG_497  | <i>DIS3L2</i> | 2  | 232995415 | c.688C>T          | p.Q230*       | 93.2 | 192 |                           |                   |                            |
| COG_4196 | <i>DIS3L2</i> | 2  | 233127938 | c.1447C>G         | p.R483G       | 52.3 | 842 | probably damaging (1)     | damaging (0.000)  | disease causing (p> 0.999) |

Chr = chromosome; Var freq = variant frequency; Cov = coverage; Polyphen2: the classification of the variants are given as "benign", "possibly damaging", "probably damaging" along with the probability of the variation being damaging (from 0 to 1); SIFT: the substitution is predicted as damaging or tolerated if the score is <= 0.05 or > 0.05, respectively; Mutation Taster: a prediction is given as either 'disease-causing' or 'polymorphism' along with a P value indicating the security of the prediction (with 1 being most secure).

**Supplementary Table 6:** Clinical features and mutation classification of 26 *DROSHA* mutated samples.

| Sample ID               | Predominant histology | Relapse | Clinical stage | QTneo | <i>DROSHA</i> mutation | Polyphen2 (score)     | SIFT (score)     | MutationTaster (score)     |
|-------------------------|-----------------------|---------|----------------|-------|------------------------|-----------------------|------------------|----------------------------|
| COG cohort              |                       |         |                |       |                        |                       |                  |                            |
| COG_128                 | Blastema              | Yes     | III            | No    | E1147K                 | probably damaging (1) | damaging (0.001) | disease causing (p> 0.999) |
| COG_970                 | Blastema              | Yes     | IIII           | No    | E1147K                 | probably damaging (1) | damaging (0.001) | disease causing (p> 0.999) |
| COG_1124                | Blastema              | No      | III            | No    | E1147K                 | probably damaging (1) | damaging (0.001) | disease causing (p> 0.999) |
| COG_1144                | Blastema              | No      | IV             | No    | E1147K                 | probably damaging (1) | damaging (0.001) | disease causing (p> 0.999) |
| COG_4181                | Blastema              | Yes     | II             | No    | E1147K                 | probably damaging (1) | damaging (0.001) | disease causing (p> 0.999) |
| COG_13                  | Blastema              | No      | III            | No    | E1147K                 | probably damaging (1) | damaging (0.001) | disease causing (p> 0.999) |
| COG_29                  | Blastema              | No      | IV             | No    | E1147K                 | probably damaging (1) | damaging (0.001) | disease causing (p> 0.999) |
| COG_1110                | Blastema              | No      | IV             | No    | E993K                  | probably damaging (1) | damaging (0.001) | disease causing (p> 0.999) |
| COG_526                 | Blastema              | Yes     | II             | No    | P211T                  | benign (0)            | damaging (0.030) | polymorphism (p> 0.999)    |
| COG_1108                | Blastema              | Yes     | II             | No    | Q46*;<br>R414*         | -                     | -                | -                          |
| ACC fresh frozen cohort |                       |         |                |       |                        |                       |                  |                            |
| ACC_08                  | Biphasic - B+E        | No      | II             | Yes   | E1147K                 | probably damaging (1) | damaging (0.001) | disease causing (p> 0.999) |
| ACC_12                  | Biphasic - E+B        | Yes     | I              | Yes   | E1147K                 | probably damaging (1) | damaging (0.001) | disease causing (p> 0.999) |

| ACC FFPE cohort |                        |    |     |     |        |                       |                  |                            |
|-----------------|------------------------|----|-----|-----|--------|-----------------------|------------------|----------------------------|
| ACCp_19         | Blastema               | No | II  | No  | E1147K | probably damaging (1) | damaging (0.001) | disease causing (p> 0.999) |
| ACCp_34         | Blastema               | No | I   | No  | E1147K | probably damaging (1) | damaging (0.001) | disease causing (p> 0.999) |
| ACCp_37         | Blastema               | NA | III | Yes | E1147K | probably damaging (1) | damaging (0.001) | disease causing (p> 0.999) |
| ACCp_72         | Biphasic B+E           | NA | NA  | NA  | E1147K | probably damaging (1) | damaging (0.001) | disease causing (p> 0.999) |
| ACCp_74         | Biphasic B+E           | No | III | Yes | E1147K | probably damaging (1) | damaging (0.001) | disease causing (p> 0.999) |
| ACCp_84         | Blastema               | No | II  | No  | E1147K | probably damaging (1) | damaging (0.001) | disease causing (p> 0.999) |
| ACCp_100        | NA                     | No | I   | No  | E1147K | probably damaging (1) | damaging (0.001) | disease causing (p> 0.999) |
| ACCp_101        | Triphasic              | No | III | No  | E1147K | probably damaging (1) | damaging (0.001) | disease causing (p> 0.999) |
| ACCp_102        | Biphasic S+E Rhab diff | No | III | Yes | E1147K | probably damaging (1) | damaging (0.001) | disease causing (p> 0.999) |
| ACCp_115        | Epithelial             | No | I   | No  | E1147K | probably damaging (1) | damaging (0.001) | disease causing (p> 0.999) |
| ACCp_136        | Blastema               | No | I   | No  | E1147K | probably damaging (1) | damaging (0.001) | disease causing (p> 0.999) |
| ACCp_151        | Tubular diff           | No | I   | No  | E1147K | probably damaging (1) | damaging (0.001) | disease causing (p> 0.999) |
| ACCp_76         | Triphasic              | No | I   | No  | D1151G | probably damaging (1) | damaging (0.004) | disease causing (p> 0.999) |
| ACCp_154        | Blastema               | NA | III | No  | D1151G | probably damaging (1) | damaging (0.004) | disease causing (p> 0.999) |

QTneo = neoadjuvant chemotherapy; NA = information not available; B = blastema; E = epithelial; S = stromal; Rhab diff = rhabdomyoblastic differentiation; diff = differentiation.



**Supplementary Table 7:** Clinical features and RNA quality of WT samples used in miRNA expression analysis.

| Sample ID | <i>DROSHA</i> status     | Histological components                                              | First treatment | Relapse | Clinical stage | RNA RIN |
|-----------|--------------------------|----------------------------------------------------------------------|-----------------|---------|----------------|---------|
| COG_970   | E1147K                   | 80% Blastema and 20% Epithelium+ Stroma (removed by macrodissection) | Surgery         | Yes     | III            | NA      |
| COG_1124  | E1147K                   | Blastema                                                             | Surgery         | No      | III            | 8.2     |
| COG_1144  | E1147K                   | Blastema                                                             | Surgery         | No      | IV             | 6.6     |
| COG_4181  | E1147K                   | Blastema                                                             | Surgery         | Yes     | II             | 7.5     |
| COG_13    | E1147K                   | NA                                                                   | Surgery         | No      | III            | 8.5     |
| COG_29    | E1147K                   | NA                                                                   | Surgery         | No      | IV             | 7.3     |
| COG_1110  | E993K                    | 50% Blastema and 50% Epithelium+ Stroma (removed by macrodissection) | Surgery         | No      | IV             | 4.5     |
| COG_1108  | Q46*;<br>R414*           | Blastema                                                             | Surgery         | Yes     | II             | 5.2     |
| COG_4057  | R32fs; <i>DGCR8</i> loss | Blastema                                                             | Surgery         | Yes     | III            | 6.3     |
| COG_002   | Wild-type                | Blastema                                                             | Surgery         | Yes     | III            | 6.4     |
| COG_095   | Wild-type                | Blastema                                                             | Surgery         | No      | III            | 8.2     |
| COG_246   | Wild-type                | Blastema                                                             | Surgery         | No      | III            | 3.1     |
| COG_697   | Wild-type                | Blastema                                                             | Surgery         | Yes     | II             | 5.6     |
| COG_1070  | Wild-type                | Blastema                                                             | Surgery         | No      | IV             | 6.5     |
| COG_4135  | Wild-type                | Blastema                                                             | Surgery         | No      | III            | 4.8     |

RIN = RNA integrity number; NA = information not available.

**Supplementary Table 8:** Differentially expressed miRNAs in *DROSHA*-E1147K mutated and non-mutated WT. *DROSHA*-E1147K tumors had a predominant reduction of mature miRNAs compared to non-mutated tumors, as 59 miRNAs were down-regulated and only 5 were up-regulated (underlined miRNAs).

| miRNA          | Fold-change | p-value FDR-corrected | Mutated means | Non-mutated means |
|----------------|-------------|-----------------------|---------------|-------------------|
| <u>miR-511</u> | 13.03       | 0.05                  | 0.0000110     | 0.0000008         |
| <u>miR-150</u> | 4.25        | 0.003                 | 0.0012704     | 0.0002991         |
| <u>miR-636</u> | 3.89        | 0.02                  | 0.0000300     | 0.0000077         |
| <u>miR-320</u> | 2.65        | 0.02                  | 0.0268548     | 0.0101420         |
| <u>miR-126</u> | 2.64        | 0.003                 | 0.1494239     | 0.0566215         |
| miR-500        | -2.04       | 0.03                  | 0.0000403     | 0.0000823         |
| miR-222        | -2.15       | 0.05                  | 0.0122761     | 0.0263598         |
| miR-28-3p      | -2.16       | 0.02                  | 0.0007771     | 0.0016779         |
| miR-660        | -2.16       | 0.02                  | 0.0009309     | 0.0020133         |
| miR-191        | -2.25       | 0.03                  | 0.0176693     | 0.0397207         |
| miR-362-5p     | -2.35       | 0.05                  | 0.0001051     | 0.0002470         |
| miR-425        | -2.37       | 0.03                  | 0.0003782     | 0.0008955         |
| miR-26a        | -2.45       | 0.05                  | 0.0103445     | 0.0253326         |
| miR-374a       | -2.60       | 0.01                  | 0.0007793     | 0.0020277         |
| miR-301a       | -2.65       | 0.02                  | 0.0013006     | 0.0034502         |
| miR-454        | -2.76       | 0.01                  | 0.0064733     | 0.0178931         |
| miR-106a       | -2.81       | 0.01                  | 0.1270424     | 0.3573796         |
| miR-28-5p      | -2.86       | 0.02                  | 0.0001966     | 0.0005620         |
| miR-186        | -2.94       | 0.03                  | 0.0024706     | 0.0072657         |
| miR-17         | -2.99       | 0.02                  | 0.1548721     | 0.4632929         |
| miR-146b-5p    | -3.01       | 0.04                  | 0.0072702     | 0.0218677         |
| miR-576-3p     | -3.15       | 0.05                  | 0.0000031     | 0.0000097         |
| miR-374b       | -3.15       | 0.02                  | 0.0029104     | 0.0091730         |
| miR-361-5p     | -3.15       | 0.03                  | 0.0000829     | 0.0002614         |
| miR-221        | -3.17       | 0.04                  | 0.0007485     | 0.0023708         |
| miR-93         | -3.21       | 0.01                  | 0.0173274     | 0.0556616         |
| miR-106b       | -3.22       | 0.01                  | 0.0048635     | 0.0156397         |
| miR-19a        | -3.27       | 0.01                  | 0.0102394     | 0.0335059         |
| miR-598        | -3.28       | 0.02                  | 0.0002171     | 0.0007116         |
| miR-128        | -3.29       | 0.05                  | 0.0000510     | 0.0001681         |
| miR-130b       | -3.33       | 0.02                  | 0.0006281     | 0.0020933         |

|             |        |         |           |           |
|-------------|--------|---------|-----------|-----------|
| miR-19b     | -3.34  | 0.01    | 0.0832017 | 0.2779872 |
| miR-301b    | -3.37  | 0.01    | 0.0004749 | 0.0016001 |
| miR-196b    | -3.49  | 0.01    | 0.0041953 | 0.0146420 |
| miR-340     | -3.57  | 0.02    | 0.0003645 | 0.0013031 |
| miR-25      | -3.59  | 0.02    | 0.0010624 | 0.0038123 |
| miR-744     | -3.62  | 0.03    | 0.0003679 | 0.0013328 |
| miR-542-3p  | -3.69  | 0.03    | 0.0000082 | 0.0000303 |
| miR-218     | -3.77  | 0.02    | 0.0040355 | 0.0152324 |
| miR-130a    | -3.79  | 0.03    | 0.0016740 | 0.0063521 |
| miR-20a     | -3.87  | 0.00    | 0.0346136 | 0.1339278 |
| miR-18b     | -4.30  | 0.02    | 0.0000388 | 0.0001667 |
| miR-194     | -4.37  | 0.003   | 0.0000656 | 0.0002870 |
| miR-181a    | -4.39  | 0.01    | 0.0002431 | 0.0010679 |
| miR-652     | -4.44  | 0.01    | 0.0002272 | 0.0010086 |
| miR-18a     | -4.55  | 0.02    | 0.0006195 | 0.0028208 |
| miR-10b     | -4.65  | 0.01    | 0.0062117 | 0.0289072 |
| miR-135a    | -4.70  | 0.01    | 0.0002408 | 0.0011309 |
| miR-199b-5p | -4.84  | 0.04    | 0.0000059 | 0.0000284 |
| miR-330-3p  | -4.96  | 0.03    | 0.0000009 | 0.0000047 |
| miR-615-5p  | -5.16  | 0.03    | 0.0000023 | 0.0000119 |
| miR-192     | -5.20  | 0.003   | 0.0002430 | 0.0012648 |
| miR-95      | -5.47  | 0.01    | 0.0000876 | 0.0004791 |
| miR-181c    | -6.20  | 0.01    | 0.0000026 | 0.0000163 |
| miR-450a    | -7.98  | 0.04    | 0.0000076 | 0.0000607 |
| miR-424     | -8.38  | 0.01    | 0.0000099 | 0.0000826 |
| miR-597     | -9.97  | 0.02    | 0.0000048 | 0.0000478 |
| miR-488     | -11.84 | 0.05    | 0.0000037 | 0.0000434 |
| miR-135b    | -12.49 | 0.003   | 0.0013583 | 0.0169711 |
| miR-505     | -13.95 | 0.02    | 0.0000016 | 0.0000220 |
| miR-423-5p  | -14.65 | 0.03    | 0.0000031 | 0.0000449 |
| miR-133b    | -16.12 | 0.02    | 0.0000017 | 0.0000277 |
| miR-874     | -36.34 | 0.00003 | 0.0000002 | 0.0000070 |
| miR-876-5p  | -37.67 | 0.00003 | 0.0000002 | 0.0000089 |

**Supplementary Table 9:** Expression of miRNAs with 5p and 3p-derived strands. DROSHA-E1147K affected both 5p and 3p-derived miRNAs. From 7 differentially expressed (at least one strand differentially expressed) and 15 non-differentially expressed miRNAs that presented data for both strands, all of them had fold-changes in the same direction for the two variants.

| Differentially expressed miRNAs |        |        |                       |
|---------------------------------|--------|--------|-----------------------|
| Feature ID                      | Strand | Fold   | p-value FDR-corrected |
| miR-146b                        | 3p     | -8.58  | 0.17                  |
|                                 | 5p     | -3.01  | 0.04                  |
| miR-28                          | 3p     | -2.16  | 0.02                  |
|                                 | 5p     | -2.86  | 0.02                  |
| miR-362                         | 3p     | -1.33  | 0.57                  |
|                                 | 5p     | -2.35  | 0.05                  |
| miR-532                         | 3p     | -1.34  | 0.62                  |
|                                 | 5p     | -1.91  | 0.05                  |
| miR-542                         | 3p     | -3.69  | 0.03                  |
|                                 | 5p     | -3.90  | 0.10                  |
| miR-615                         | 3p     | -3.41  | 0.18                  |
|                                 | 5p     | -5.16  | 0.03                  |
| miR-876                         | 3p     | -1.82  | 0.17                  |
|                                 | 5p     | -37.67 | 0.00003               |

| Non-differentially expressed miRNAs |        |        |                       |
|-------------------------------------|--------|--------|-----------------------|
| Feature ID                          | Strand | Fold   | p-value FDR-corrected |
| miR-125a                            | 3p     | -1.30  | 0.44                  |
|                                     | 5p     | -1.07  | 0.83                  |
| miR-140                             | 3p     | -1.66  | 0.25                  |
|                                     | 5p     | -2.13  | 0.07                  |
| miR-142                             | 3p     | 1.21   | 0.84                  |
|                                     | 5p     | 1.79   | 0.85                  |
| miR-193a                            | 3p     | -1.56  | 0.33                  |
|                                     | 5p     | -1.51  | 0.36                  |
| miR-199a                            | 3p     | -2.82  | 0.48                  |
|                                     | 5p     | -1.16  | 0.79                  |
| miR-296                             | 3p     | -17.67 | 0.14                  |
|                                     | 5p     | -29.52 | 0.08                  |
| miR-324                             | 3p     | -1.80  | 0.26                  |
|                                     | 5p     | -1.66  | 0.35                  |
| miR-331                             | 3p     | -2.42  | 0.08                  |
|                                     | 5p     | -2.37  | 0.16                  |
| miR-339                             | 3p     | -1.26  | 0.41                  |
|                                     | 5p     | -2.08  | 0.08                  |
| miR-342                             | 3p     | -1.56  | 0.19                  |
|                                     | 5p     | -2.18  | 0.19                  |
| miR-455                             | 3p     | -3.02  | 0.17                  |
|                                     | 5p     | -2.05  | 0.13                  |
| miR-486                             | 3p     | 2.76   | 0.88                  |
|                                     | 5p     | 8.26   | 0.13                  |
| miR-502                             | 3p     | -1.95  | 0.13                  |
|                                     | 5p     | -1.49  | 0.37                  |
| miR-654                             | 3p     | -2.26  | 0.74                  |
|                                     | 5p     | -3.07  | 0.85                  |
| miR-886                             | 3p     | 1.43   | 0.84                  |
|                                     | 5p     | 3.64   | 0.92                  |

**Supplementary Table 10:** Expression of primary and mature miRNA pairs. The expression of 15 primary and mature miRNA pairs was assessed with TaqMan individual assays. From eight differentially expressed miRNA pairs, all mature miRNAs were validated as differentially expressed between *DROSHA*-E1147K and wild-type groups; none of the eight pri-miRNAs presented any significant difference. For all six non-differentially expressed miRNA pairs used as controls, neither mature miRNAs nor pri-miRNAs presented any significant difference between the groups.

| miRNA                                     | TLDA miRNA card |               | Individual Taqman assay |         | Primary miRNA Individual Taqman assay |        |         |
|-------------------------------------------|-----------------|---------------|-------------------------|---------|---------------------------------------|--------|---------|
|                                           | Fold            | p value (FDR) | Fold                    | p value | pri-miRNA                             | Fold   | p value |
| Differentially expressed miRNAs pairs     |                 |               |                         |         |                                       |        |         |
| miR-95                                    | -4.47           | 0.01          | -3.16                   | 0.01    | pri-95                                | -4.28  | 0.19    |
| miR-128a                                  | -3.29           | 0.04          | -3.24                   | 0.007   | pri-128                               | -2.38  | 0.60    |
| miR-135b                                  | -12.49          | 0.003         | -9.00                   | 0.0001  | pri-135b                              | -10.83 | 0.28    |
| miR-874                                   | -36.34          | 0.00003       | -4.00                   | 0.005   | pri-874                               | -2.37  | 0.79    |
| miR-876-5p                                | -37.67          | 0.00003       | -5.83                   | 0.001   | pri-876                               | 3.55   | 0.38    |
| miR-126                                   | 2.64            | 0.003         | 2.14                    | 0.006   | pri-126                               | -6.10  | 0.76    |
| miR-150                                   | 4.25            | 0.003         | 2.43                    | 0.02    | pri-150                               | -1.39  | 0.98    |
| miR-636                                   | 3.89            | 0.01          | 3.34                    | 0.001   | pri-636                               | 1.24   | 0.63    |
| Non-differentially expressed miRNAs pairs |                 |               |                         |         |                                       |        |         |
| miR-26b                                   | -2.08           | 0.06          | -1.53                   | 0.11    | pri-26b                               | 4.90   | 0.14    |
| Let-7b                                    | -1.04           | 0.61          | -2.36                   | 0.63    | pri-Let-7b                            | -10.21 | 0.76    |
| Let-7c                                    | -1.07           | 0.64          | 1.18                    | 0.93    | pri-Let-7c                            | -1.04  | 0.65    |
| Let-7d                                    | -1.81           | 0.68          | -2.43                   | 0.81    | pri-Let-7d                            | -1.45  | 0.69    |
| Let-7e                                    | -1.90           | 0.60          | -1.87                   | 0.23    | pri-Let-7e                            | -2.19  | 0.75    |
| Let-7g                                    | -2.07           | 0.87          | -2.14                   | 0.72    | pri-Let-7g                            | -3.98  | 0.07    |

**Supplementary Table 11:** Concordant down-regulated miRNAs in *DROSHA*-mutated tumors and HEK293-E1147K transiently transfected cells. 31 of 59 down-regulated miRNAs in *DROSHA*-mutated tumors also had a decreased expression in HEK293-E1147K cells.

| miRNA      | Tumor samples |                              | HEK293-E1147K Cell line |      |       |       |
|------------|---------------|------------------------------|-------------------------|------|-------|-------|
|            | Fold          | p-value<br>FDR-<br>corrected | STEM<br>profile         | T1   | T2    | T3    |
| miR-106a   | -2.81         | 0.01                         | 2                       | 0.00 | -1.38 | -1.34 |
| miR-106b   | -3.22         | 0.01                         | 2                       | 0.00 | -1.43 | -1.50 |
| miR-128    | -3.29         | 0.05                         | 1                       | 0.00 | -2.45 | -3.57 |
| miR-130b   | -3.33         | 0.02                         | 2                       | 0.00 | -2.09 | -1.72 |
| miR-17     | -2.99         | 0.02                         | 2                       | 0.00 | -1.63 | -1.48 |
| miR-18a    | -4.55         | 0.02                         | 2                       | 0.00 | -2.24 | -2.73 |
| miR-18b    | -4.30         | 0.02                         | 1                       | 0.00 | -1.16 | -2.14 |
| miR-191    | -2.25         | 0.03                         | 2                       | 0.00 | -1.05 | -0.95 |
| miR-194    | -4.37         | 0.003                        | 2                       | 0.00 | -3.19 | -1.93 |
| miR-19a    | -3.27         | 0.01                         | 1                       | 0.00 | -0.84 | -1.30 |
| miR-19b    | -3.34         | 0.01                         | 2                       | 0.00 | -1.82 | -1.82 |
| miR-20a    | -3.87         | 0.00                         | 1                       | 0.00 | -1.53 | -2.16 |
| miR-218    | -3.77         | 0.02                         | 2                       | 0.00 | -1.27 | -1.37 |
| miR-221    | -3.17         | 0.04                         | 2                       | 0.00 | -2.47 | -3.04 |
| miR-25     | -3.59         | 0.02                         | 2                       | 0.00 | -2.19 | -2.73 |
| miR-26a    | -2.45         | 0.05                         | 1                       | 0.00 | -0.96 | -1.65 |
| miR-28-3p  | -2.16         | 0.02                         | 2                       | 0.00 | -2.74 | -1.99 |
| miR-301a   | -2.65         | 0.02                         | 2                       | 0.00 | -2.13 | -2.03 |
| miR-301b   | -3.37         | 0.01                         | 2                       | 0.00 | -2.05 | -2.16 |
| miR-340    | -3.57         | 0.02                         | 1                       | 0.00 | -1.00 | -1.58 |
| miR-361-5p | -3.15         | 0.03                         | 2                       | 0.00 | -3.34 | -2.22 |
| miR-362-5p | -2.35         | 0.05                         | 2                       | 0.00 | -2.47 | -3.34 |
| miR-425    | -2.37         | 0.03                         | 2                       | 0.00 | -1.88 | -1.25 |
| miR-500    | -2.04         | 0.03                         | 2                       | 0.00 | -1.73 | -1.11 |
| miR-576-3p | -3.15         | 0.05                         | 1                       | 0.00 | -0.78 | -1.17 |
| miR-597    | -9.97         | 0.02                         | 1                       | 0.00 | -0.28 | -1.06 |
| miR-598    | -3.28         | 0.02                         | 1                       | 0.00 | -0.88 | -1.92 |
| miR-652    | -4.44         | 0.01                         | 2                       | 0.00 | -2.31 | -1.86 |
| miR-660    | -2.16         | 0.02                         | 2                       | 0.00 | -1.41 | -1.01 |
| miR-744    | -3.62         | 0.03                         | 2                       | 0.00 | -0.87 | -1.14 |
| miR-93     | -3.21         | 0.01                         | 2                       | 0.00 | -2.33 | -2.13 |

T1, T2 and T3 represent the log2 transformed expression value of each time point normalized according to STEM method, in which the expression values are normalized to start at 0 (T1=0).

**Supplementary Table 12:** Primer sequences used in Sanger sequencing, pyrosequencing and duplex qPCR analyses.

| Template            | Region                        | Forward sequence                     | Reverse sequence         |
|---------------------|-------------------------------|--------------------------------------|--------------------------|
| Sanger sequencing   |                               |                                      |                          |
| DNA                 | <i>DROSHA</i> RIIIb_1         | GAAATTTCTGCTCATGGAGAAGG              | CCAATTCCTTCGAAGGGCATG    |
| DNA                 | <i>DROSHA</i> RIIIb_2*        | ATCGAGGGGCCTTAGGGAAT                 | ACCCCTCTAATCTTCACTCTGC   |
| DNA                 | <i>DROSHA</i> RIIIb_3         | CTCTCAGGCTAGTTGGGTC                  | ACAAGGTTTCTTTAGCCAGAAC   |
| DNA                 | <i>DROSHA</i> RIIIb_4         | GAGGGCCTGGAAGTTGAAAC                 | GGGCTCCTGTCATGATCACC     |
| cDNA                | <i>DROSHA</i> RIIIa_1         | CGATCAACTGGATCGTGAACAG               | CATGTGATGAACTTTTCTGTCTCC |
| cDNA                | <i>DROSHA</i> RIIIa_2         | GGAGACAGAAAAGTTCATCACATG             | GATAATTGAGCCAGACTTCGC    |
| cDNA                | <i>DROSHA</i> RIIIb*          | GCGAAGTCTGGCTCAATTATC                | GGGTCATTCCAATCCTGATTC    |
| Pyrosequencing      |                               |                                      |                          |
| FFPE DNA            | <i>DROSHA</i> RIIIb* (PCR)    | 5BIO-CCAGAGGCCACAATCAGAG             | ACCCCTCTAATCTTCACTCTGC   |
| FFPE DNA            | <i>DROSHA</i> RIIIb* (Seq)    |                                      | TTATGGAGTCACCTAGGAAT     |
| Allele specific PCR |                               |                                      |                          |
| cDNA                | <i>DROSHA</i> Exon 4-11 (PCR) | GGCTGCTTCACCCTCAG <b>I</b>           | GCATTGTTGGTCATAGGACGAC   |
| cDNA                | <i>DROSHA</i> Exon 4-11 (PCR) | GCTGCTTCACCCTCAG <b>C</b>            |                          |
| cDNA                | <i>DROSHA</i> Exon 7 (Seq)    | GTTGGAGTGACAACCAGAGTTC <sup>#2</sup> |                          |
| Duplex qPCR         |                               |                                      |                          |
|                     | <i>DROSHA</i> Exon 24         | GTAGCGTCCATTTGTA CTATTTG             | TGCTGCAGATGTCTTCTATACC   |
|                     | <i>GAPDH</i> Intron 7         | GCTCCACCTTTCTCATCC                   | CTGCAGCGTACTCCCCAC       |

\* = regions spanning the hotspot E1147K *DROSHA* mutation; Seq = sequencing

## SUPPLEMENTARY METHODS

### **STEM analysis**

For the transiently transfected cell lines, the regulation of miRNA expression of each population of cells (mock, Drosha wild-type or Drosha-E1147K) during the time course experiment was evaluated with STEM analysis (<http://www.cs.cmu.edu/~jernst/stem/>). The STEM clustering method initially defines a set of distinct and representative model of temporal expression profiles that correspond to possible profiles of a gene's expression change over time, independent of the data. All model profiles start at 0, and between two time points a model profile can either hold steady, increase or decrease an integral number of units up to a parameter value. In our analysis, the parameter value was defined as fold-change  $\geq |2|$ . Then, the  $\log_2$  gene expression values of the time series experiment for each miRNA are normalized, so that T1 corresponds to 0 (T1=0), and T2 and T3 are normalized accordingly. Each miRNA is assigned to the model profile to which its time series most closely matches based on the correlation coefficient. The number of miRNAs assigned to each model profile is then computed. Also, the number of miRNAs expected by chance to be assigned to a profile is calculated by randomly permuting the original time point values, renormalizing the expression values, then assigning miRNAs to their most closely matching model profiles, and repeating for a large number of permutations. The average number of all permutations is used as the estimate of the expected number of miRNAs assigned to the profile. The statistical significance of the number of miRNAs assigned to each profile versus the number expected is then computed, indicating if the profile presents more or less miRNAs than expected by chance.



## Supplementary Reference

1. Torrezan, G. T. *et al.* A novel SYBR-based duplex qPCR for the detection of gene dosage: detection of an APC large deletion in a familial adenomatous polyposis patient with an unusual phenotype. *BMC Med. Genet.* **13**, 55 (2012).
